# Supplementary material for: Dinuclear uranium(vi) salen coordination compound: an efficient visible-light-active catalyst for selective reduction of CO2 to methanol
Source: Royal Society of Chemistry journal article supplement (doi:10.1039/d0dt02620d), 2020-01-01
Supplement: d0dt02620d1.pdf [file d0dt02620d1.pdf]

## Supporting information

### **Dinuclear uranium(VI) salen coordination compound: An efficient visible light active catalyst for selective reduction of CO<sub>2</sub> to methanol**

Mohammad Azam<sup>1\*</sup>, Umesh Kumar<sup>2\*</sup>, Joshua O. Olowoyo,<sup>2</sup> Saud I Al-Resayes<sup>1</sup>, Agata Trzesowska-Kruszynska<sup>3</sup>, Rafal Kruszynski,<sup>3</sup> Mohammad Shahidul Islam<sup>1</sup>, Mohammad Rizwan Khan<sup>1</sup>, S.F. Adil<sup>1</sup>, Mohammad Rafique Siddiqui<sup>1</sup>, Fahad Ahmed Al-Harhi<sup>1</sup>, Abdul Karim Alinzi<sup>1</sup>, Saikh Mohammad Wabaidur<sup>1</sup>, Masoom Raza Siddiqui<sup>1</sup>, Mohammed Rafi Shaik<sup>1</sup>, Suman L. Jain<sup>2</sup>, M. Amin Farkhondehfal<sup>4</sup>, Simelys Hernández<sup>5</sup>

<sup>1</sup>*Department of Chemistry, College of Science, King Saud University, P. O. Box 2455, Riyadh 11451, KSA*

<sup>2</sup>*Chemical Science Division, CSIR-Indian Institute of Petroleum Dehradun, India-248005*

<sup>3</sup>*Institute of General and Ecological Chemistry, Lodz University of Technology, Zeromskiego 116, 90-924, Lodz, Poland*

<sup>4</sup>*Center for Sustainable Future Technologies @POLITO, IstitutoItaliano di Tecnologia, Via Livorno 60, 10144 Turin, Italy*

<sup>5</sup>*Department of Applied Science and Technology, Politecnico di Torino, C.so Duca degli Abruzzi 24, 10129 Turin, Italy*

For correspondence: [azam\\_res@yahoo.com](mailto:azam_res@yahoo.com); [mhashim@ksu.edu.sa](mailto:mhashim@ksu.edu.sa) [umesh\\_kumar@iip.res.in](mailto:umesh_kumar@iip.res.in)  
Telephone & Fax: +966-1-4675982

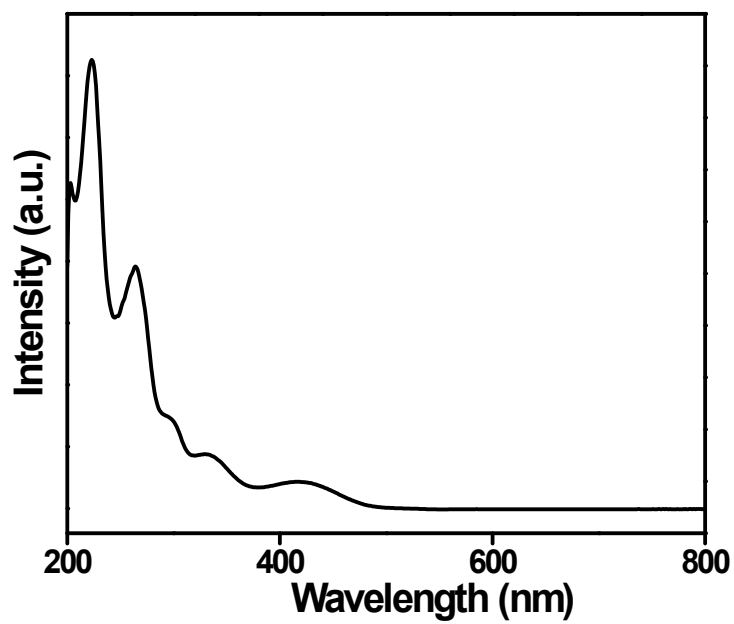

**Fig. S1** UV-vis absorption spectrum of  $[(\text{UO}_2)_2(\text{L})_2] \cdot 2\text{MeCN}$  in MeCN

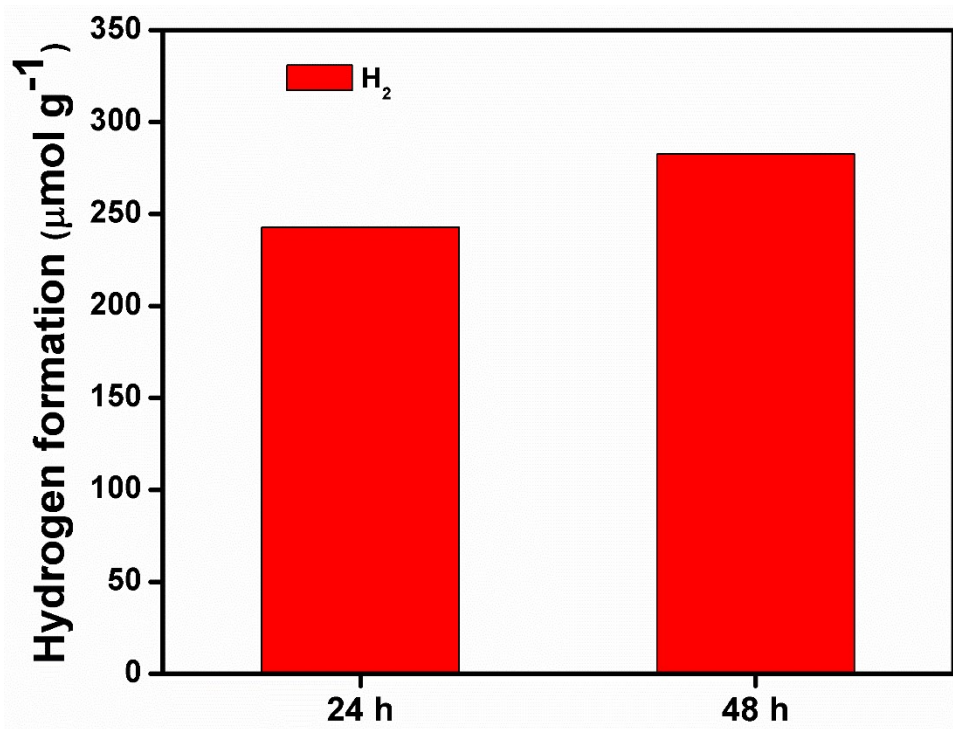

**Fig. S2** The formation of H<sub>2</sub> from MeCN: H<sub>2</sub>O: TEOA mixture under visible light during the photocatalytic reduction of CO<sub>2</sub>.

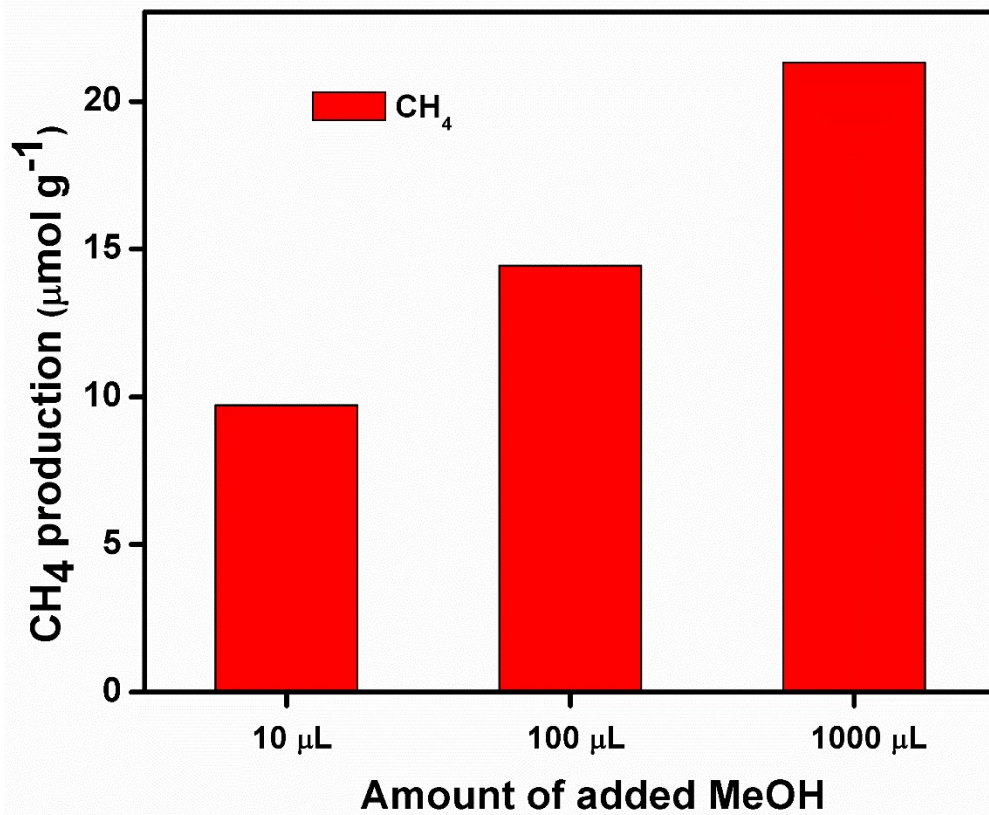

**Fig. S3** The formation of CH<sub>4</sub> from MeCN:H<sub>2</sub>O:TEOA mixture in the presence of different concentrations of MeOH

Joshua Olowoyo 1H/D2O  
1H NMR  
22.10.18

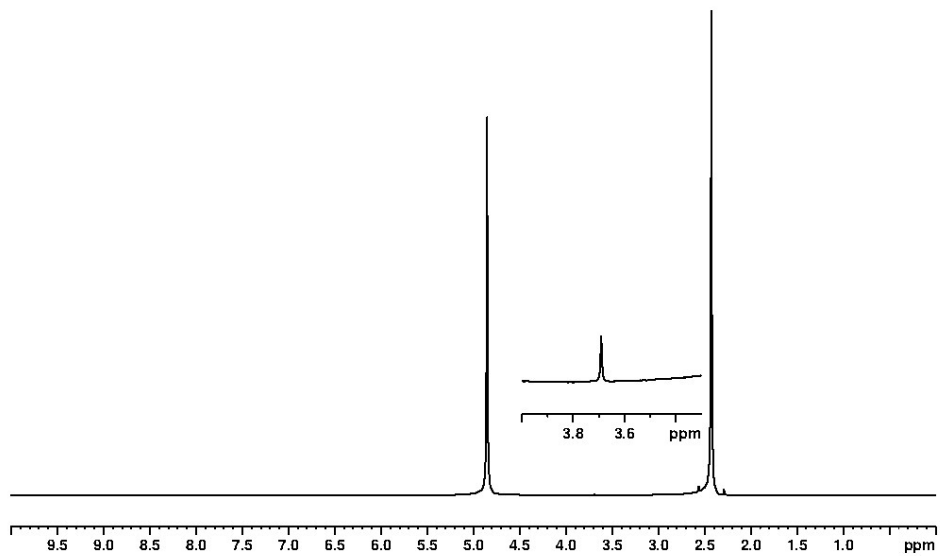

**Fig. S4** <sup>1</sup>H NMR spectrum of the photocatalytic product from the reduction of <sup>13</sup>CO<sub>2</sub>.

Joshua Olowoyo /d2o  
13C NMR  
23.10.18

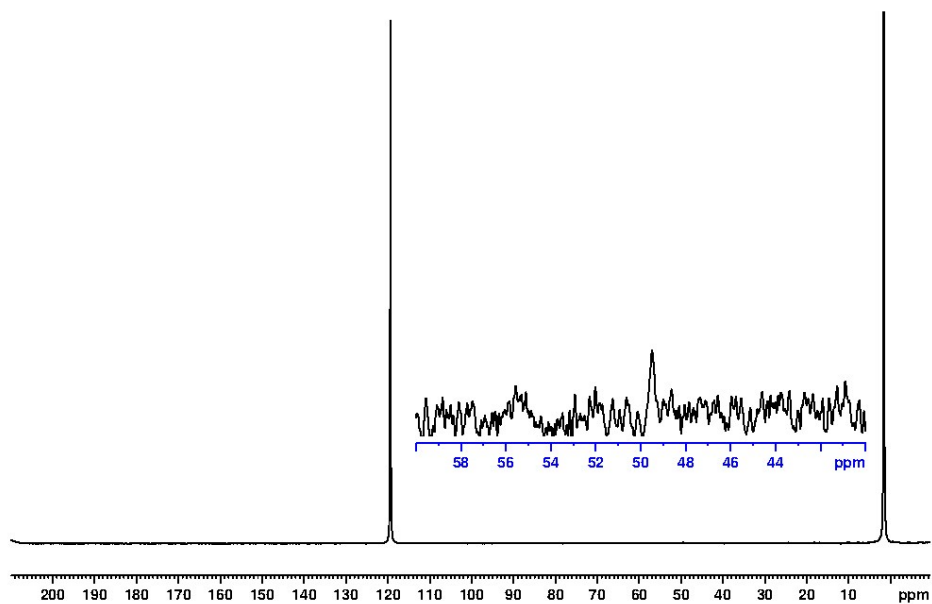

**Fig. S5**  $^{13}\text{C}$  NMR spectrum of the photocatalytic product from the reduction of  $^{13}\text{CO}_2$

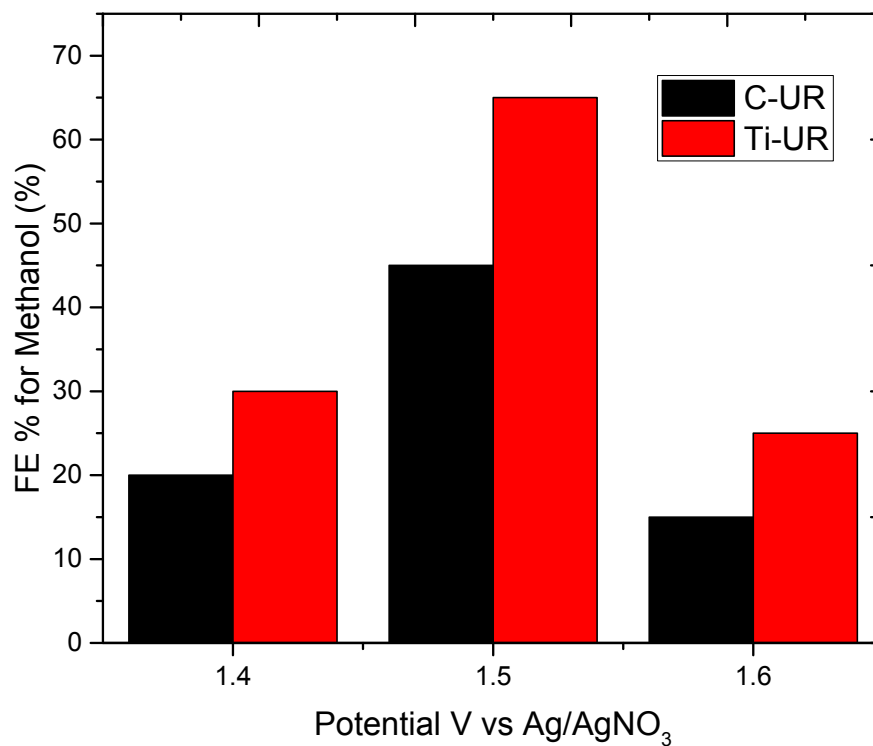

**Fig. S6** Faradaic efficiency of MeOH production for two different electrodes of GDL with the catalyst (C-UR) and Ti compound (Ti-UR) in the solution of 0.1M Bu<sub>4</sub>NPF<sub>6</sub> in MeCN being bubbled with CO<sub>2</sub> in 3 different potentials after 2 hours of test

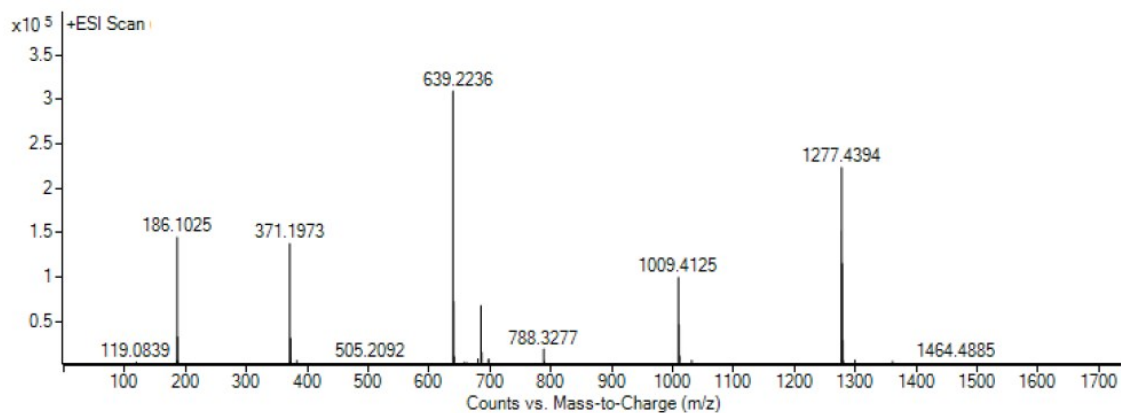

**Fig. S7** ESI mass spectrum of the title complex in MeCN

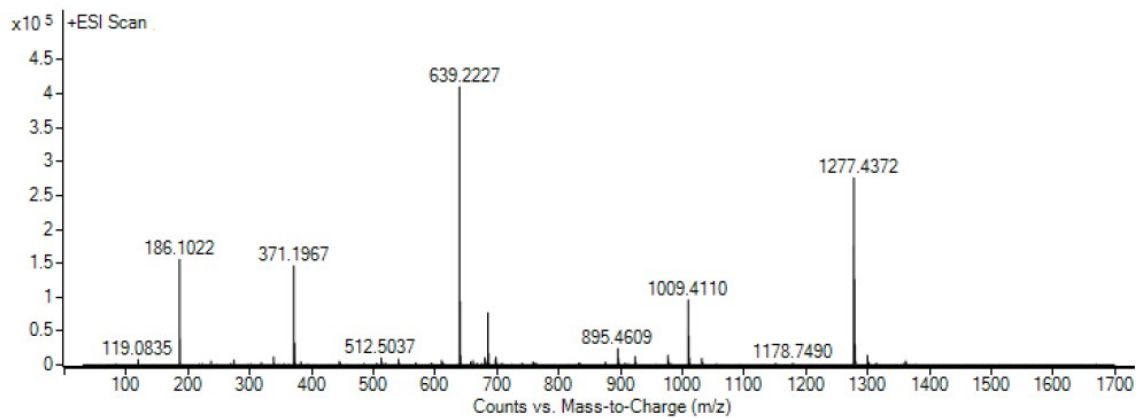

**Fig. S8** ESI mass spectrum of the title complex before the photocatalytic reduction of CO<sub>2</sub> in the MeCN: H<sub>2</sub>O: TEOA



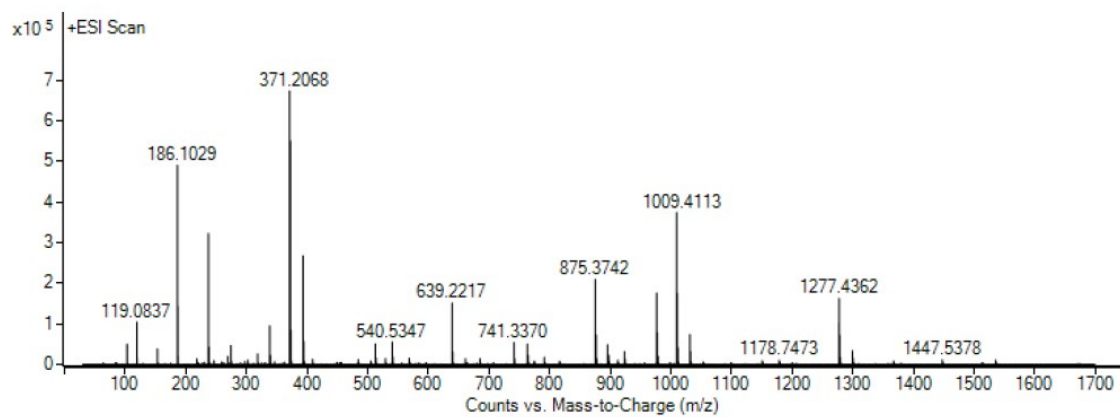

**Fig. S9** ESI mass spectrum of the title complex after the photocatalytic reduction of CO<sub>2</sub> in MeCN:H<sub>2</sub>O:TEOA under visible light irradiation.

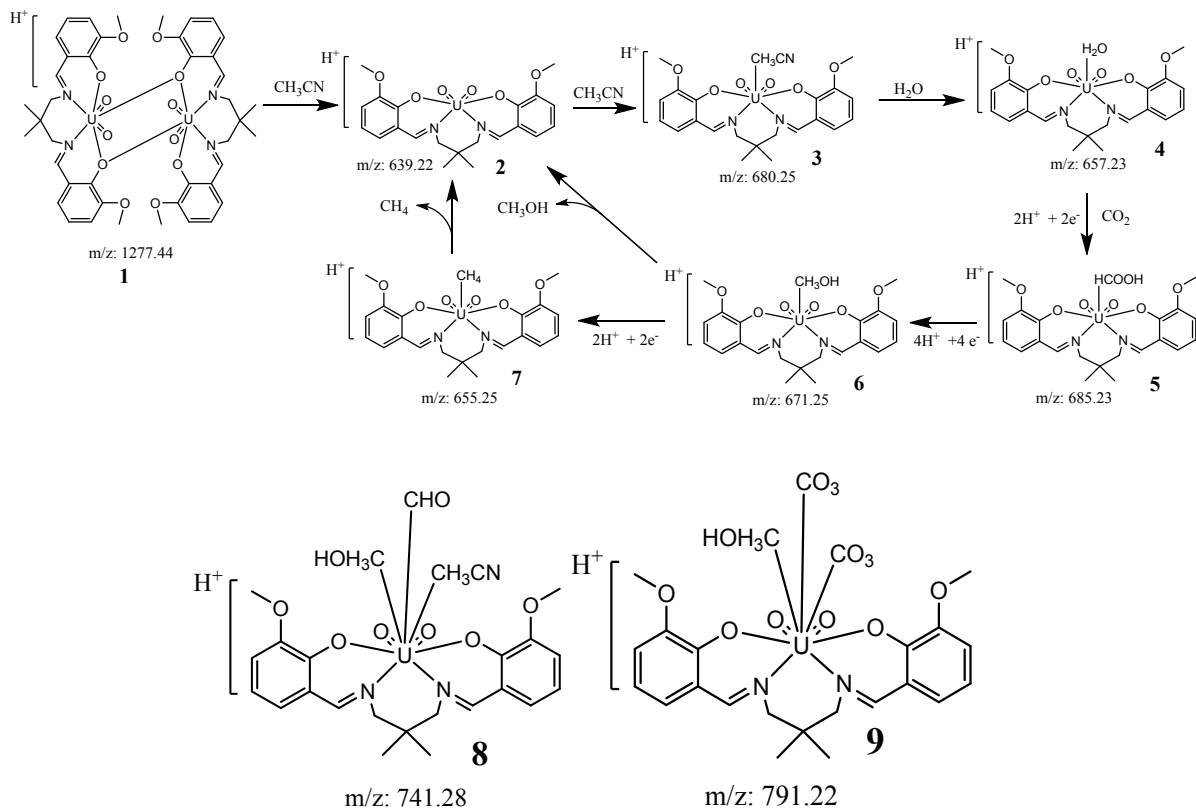

**Scheme S1** Possible structures of the catalyst on interaction with reactant, product and intermediate products on photocatalytic reduction of  $\text{CO}_2$  under visible light.

The  $^1\text{H}$  NMR spectrum of the title complex contains two sets of resonant frequencies originating from aliphatic and aromatic protons. A sharp singlet of azomethine (4H, -CH=N) resonance exists at 8.31 ppm and of  $-\text{OCH}_3$ ,  $-\text{CH}_2$  and  $-\text{CH}_3$  protons appear at 3.90 ppm, 3.48 ppm, and 1.05 ppm, respectively. The broad peaks at 6.79-6.99 ppm reflect the resonant frequencies of aromatic protons [Fig. S10].

The  $^{13}\text{C}$  NMR spectrum of the title complex contains peaks at 24.2 ppm, 56.0 ppm, 67.3 ppm, 36.1 ppm, associated with  $-\text{CH}_3$ , quaternary carbon atom,  $-\text{CH}_2$  and  $-\text{OCH}_3$  resonant frequencies, respectively. The most characteristic signal of the spectrum, originating from the presence of an azomethine functional group, appears at 165.7 ppm. The resonant frequencies generated by the Ar-C-O- and Ar-C-O- $\text{CH}_3$  carbon atoms are at 152.0 ppm, and 148.4 ppm, respectively. The signals at 113.7-122.8 ppm are assigned to aromatic carbon atoms [Fig. S11].

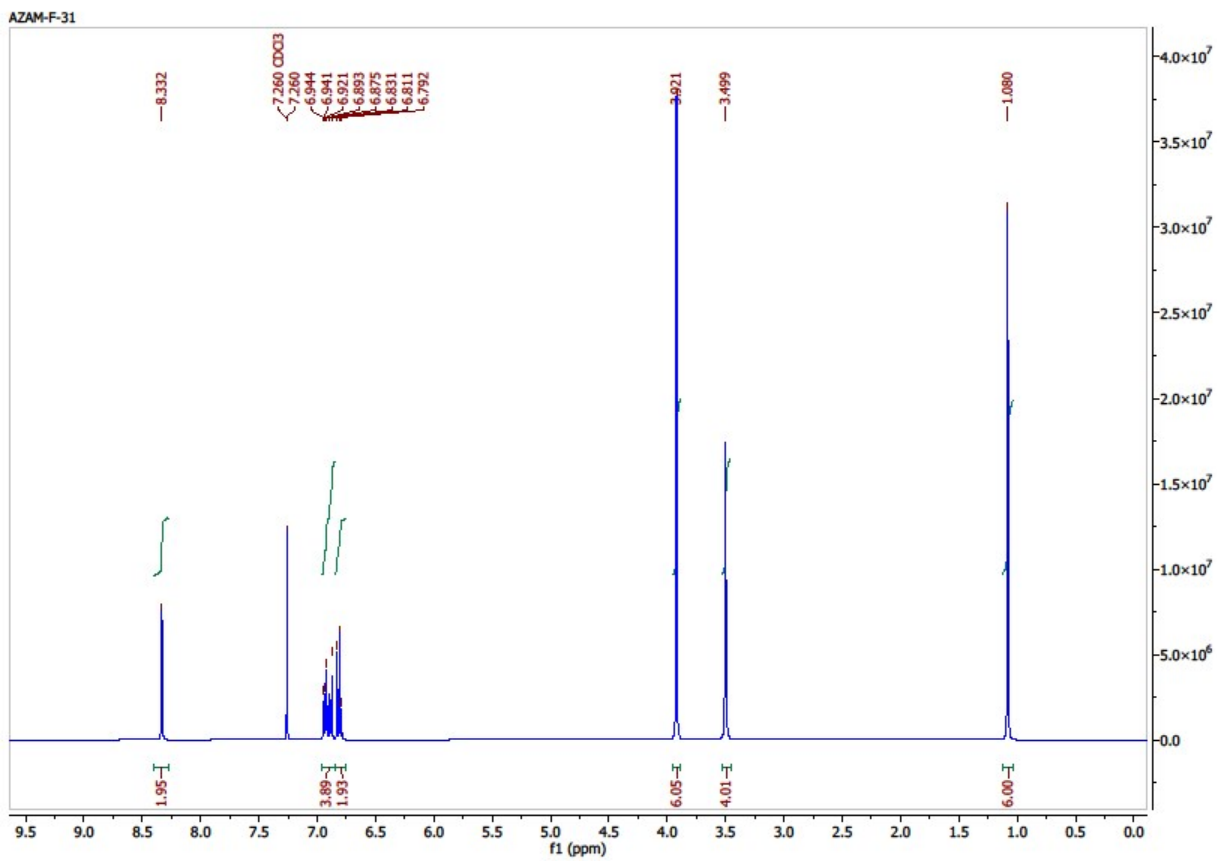

Fig. S10. <sup>1</sup>H NMR spectrum of the title complex

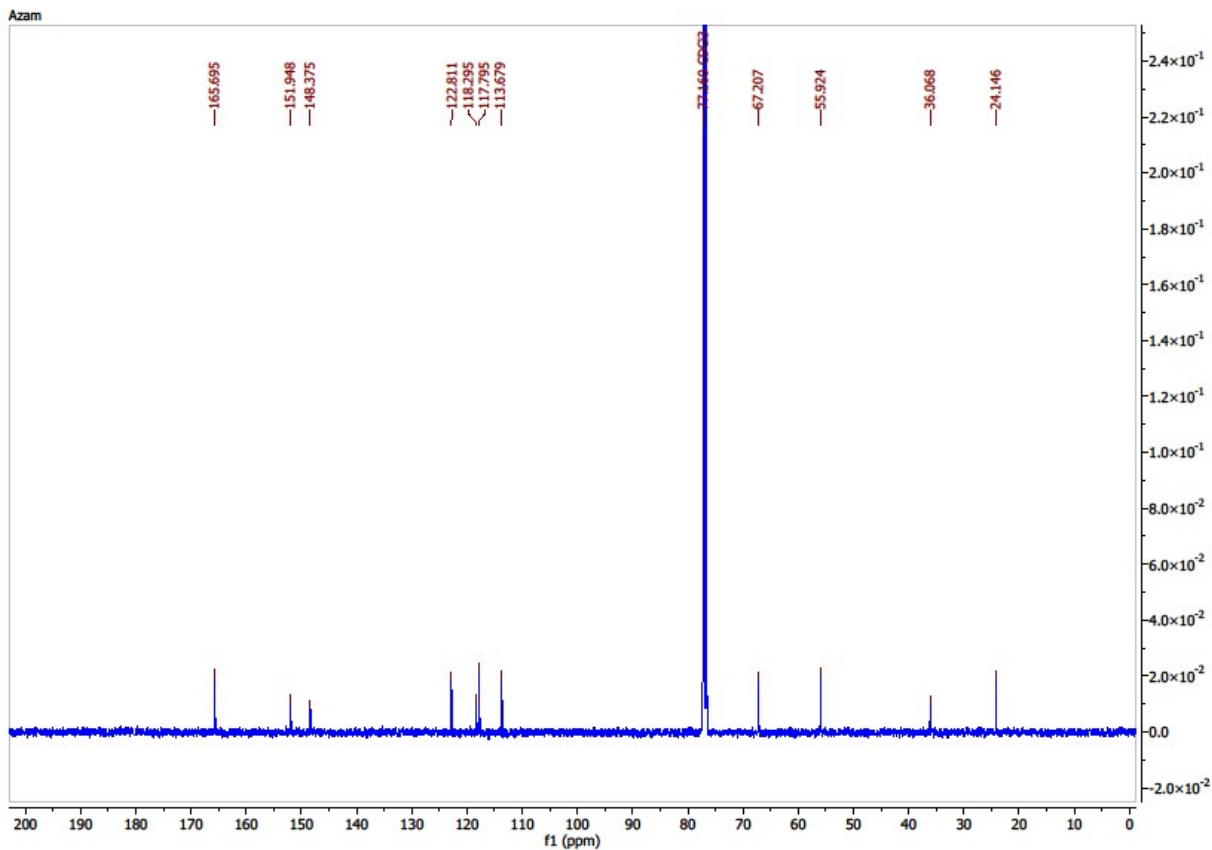

Fig. S11.  $^{13}\text{C}$  NMR spectrum of the title complex

The IR spectrum possesses well-shaped band at  $1592\text{ cm}^{-1}$  caused by  $\nu_{(\text{CH}=\text{N})}$  vibrations. This also confirms the presence of an azomethine group in the studied compound<sup>1</sup>. The most characteristic band of the coordinated uranyl ion exists at  $987\text{ cm}^{-1}$ , and this value is typical for uranium in a similar environment<sup>2-3</sup>

#### References

1. N. E. El-Gamel, *RSC adv.*, 2012, **2**, 5870-5876.
2. R. Kannappan, S. Tanase, D. M. Tooke, A. L. Spek, I. Mutikainen, U. Turpeinen and J. Reedijk, *Polyhedron*, 2004, **23**, 2285-2291.

3. G. A. Kolawole and K. S. Patel, *J. Chem. Soc., Dalton Trans.*, 1981, 1241-1245.

Table S1. Crystal and structure refinement data of the complex

| Compound                                            | Compound                                                                                                                                              |
|-----------------------------------------------------|-------------------------------------------------------------------------------------------------------------------------------------------------------|
| Empirical formula                                   | C <sub>46</sub> H <sub>54</sub> N <sub>6</sub> O <sub>12</sub> U <sub>2</sub>                                                                         |
| Formula weight                                      | 1359.01                                                                                                                                               |
| Crystal system, space group                         | triclinic, <i>P</i> -1 (No. 2)                                                                                                                        |
| Unit cell dimensions [Å, °]                         | <i>a</i> = 8.95682(16)<br><i>b</i> = 14.2454(2)<br><i>c</i> = 18.8663(3)<br>$\alpha$ = 82.0310(13)<br>$\beta$ = 84.2723(13)<br>$\gamma$ = 89.8078(14) |
| Volume [Å <sup>3</sup> ]                            | 2371.93(7)                                                                                                                                            |
| Z, Calculated density [Mg/m <sup>3</sup> ]          | 2, 1.903                                                                                                                                              |
| <i>F</i> (000)                                      | 1304                                                                                                                                                  |
| Crystal size [mm]                                   | 0.168, 0.135, 0.080                                                                                                                                   |
| $\theta$ range for data collection [°]              | 3.661 to 79.112                                                                                                                                       |
| Index ranges                                        | -11 ≤ <i>h</i> ≤ 9, -18 ≤ <i>k</i> ≤ 15, -23 ≤ <i>l</i> ≤ 24                                                                                          |
| Reflections collected / unique                      | 39298 / 10051 [ <i>R</i> <sub>(int)</sub> = 0.0326]                                                                                                   |
| Completeness [%]                                    | 100% (to $\theta$ = 67°)                                                                                                                              |
| Data / restraints / parameters                      | 10051 / 0 / 606                                                                                                                                       |
| Goodness-of-fit on <i>F</i> <sup>2</sup>            | 1.189                                                                                                                                                 |
| Final <i>R</i> indices [ <i>I</i> > 2σ( <i>I</i> )] | <i>R</i> 1 = 0.0306, <i>wR</i> 2 = 0.0884                                                                                                             |
| <i>R</i> indices (all data)                         | <i>R</i> 1 = 0.0306, <i>wR</i> 2 = 0.0885                                                                                                             |
| Largest diff. peak and hole [e•Å <sup>-3</sup> ]    | 1.982, -1.503                                                                                                                                         |



Table S2. Selected distances and angles of complex [ $\text{\AA}$ ].

| Uranyl complex |            |            |            |
|----------------|------------|------------|------------|
| U1—O5          | 1.788(3)   | U2—O11     | 1.776(3)   |
| U1—O6          | 1.788(3)   | U2—O12     | 1.786(3)   |
| U1—O2          | 2.235(3)   | U2—O8      | 2.249(3)   |
| U1—O1          | 2.377(3)   | U2—O1      | 2.513(3)   |
| U1—O7          | 2.545(3)   | U2—O7      | 2.377(3)   |
| U1—N1          | 2.558(4)   | U2—N3      | 2.533(4)   |
| U1—N2          | 2.594(4)   | U2—N4      | 2.587(4)   |
| C7—N1          | 1.295(6)   | C28—N3     | 1.291(6)   |
| N1—C8          | 1.465(6)   | N3—C29     | 1.477(6)   |
| C12—N2         | 1.466(6)   | C33—N4     | 1.474(6)   |
| N2—C13         | 1.286(6)   | N4—C34     | 1.293(6)   |
| O5—U1—O6       | 170.12(14) | O11—U2—O12 | 168.08(15) |
| O5—U1—O2       | 90.41(14)  | O11—U2—O8  | 89.60(14)  |
| O6—U1—O2       | 93.16(13)  | O12—U2—O8  | 94.97(14)  |
| O5—U1—O1       | 95.28(13)  | O11—U2—O7  | 94.60(13)  |
| O6—U1—O1       | 86.04(13)  | O12—U2—O7  | 87.13(13)  |
| O2—U1—O1       | 150.96(11) | O8—U2—O7   | 149.13(11) |
| O5—U1—O7       | 80.55(12)  | O11—U2—O1  | 78.67(13)  |
| O6—U1—O7       | 108.74(12) | O12—U2—O1  | 112.60(13) |
| O2—U1—O7       | 88.28(11)  | O8—U2—O1   | 85.74(11)  |
| O1—U1—O7       | 64.77(10)  | O7—U2—O1   | 65.29(10)  |
| O5—U1—N1       | 84.01(13)  | O11—U2—N3  | 82.14(14)  |
| O6—U1—N1       | 87.31(13)  | O12—U2—N3  | 87.40(13)  |
| O2—U1—N1       | 139.59(12) | O8—U2—N3   | 140.88(12) |
| O1—U1—N1       | 69.42(11)  | O7—U2—N3   | 69.92(11)  |
| O7—U1—N1       | 129.66(11) | O1—U2—N3   | 129.12(11) |
| O5—U1—N2       | 88.63(13)  | O11—U2—N4  | 88.37(14)  |
| O6—U1—N2       | 83.91(13)  | O12—U2—N4  | 82.80(13)  |
| O2—U1—N2       | 70.38(11)  | O8—U2—N4   | 70.61(12)  |
| O1—U1—N2       | 138.05(11) | O7—U2—N4   | 139.96(12) |
| O7—U1—N2       | 156.05(11) | O1—U2—N4   | 153.15(11) |
| N1—U1—N2       | 69.50(11)  | N3—U2—N4   | 70.99(12)  |
| O5—U1—U2       | 76.00(10)  | O11—U2—U1  | 74.28(11)  |
| O6—U1—U2       | 109.77(10) | O12—U2—U1  | 112.78(11) |
| O2—U1—U2       | 120.93(8)  | O8—U2—U1   | 118.08(9)  |
| O1—U1—U2       | 35.15(7)   | O7—U2—U1   | 35.96(8)   |
| O7—U1—U2       | 33.26(7)   | O1—U2—U1   | 33.00(7)   |
| N1—U1—U2       | 96.49(8)   | N3—U2—U1   | 96.39(8)   |
| N2—U1—U2       | 160.43(8)  | N4—U2—U1   | 160.02(8)  |



Table S3. Hydrogen bonds geometry of uranyl complex [ $\text{\AA}$ ,  $^\circ$ ].

| D—H $\cdots$ A                              | d(D-H) | d(H $\cdots$ A) | $\angle$ (DHA) | d(D $\cdots$ A) |
|---------------------------------------------|--------|-----------------|----------------|-----------------|
| C20—H20C $\cdots$ O12                       | 0.96   | 2.58            | 3.099(7)       | 113.9           |
| C42—H42B $\cdots$ O8                        | 0.96   | 2.57            | 3.137(6)       | 117.6           |
| C52—H52C $\cdots$ O4                        | 0.96   | 2.50            | 3.203(8)       | 129.7           |
| C62—H62C $\cdots$ O6 <sup>[x-1, y, z]</sup> | 0.96   | 2.55            | 3.462(7)       | 159.2           |
